# Supplementary material
Source: HighWire-hosted journal article supplement (https://bmjopen.bmj.com/content/7/12/e018488)
Supplement: inline-supplementary-material-1 [file inline-supplementary-material-1.pdf]

## Appendix 1: Description of ICES databases

| NAME OF DATABASE                                                                 | DATABASE CONTENT                                                                                                                                                                                                                                                                                                                                                                |
|----------------------------------------------------------------------------------|---------------------------------------------------------------------------------------------------------------------------------------------------------------------------------------------------------------------------------------------------------------------------------------------------------------------------------------------------------------------------------|
| Canadian Institute for Health Information–Discharge Abstract Database (CIHI-DAD) | Patient-level demographic, diagnostic, procedural and treatment information on all acute care hospitalizations                                                                                                                                                                                                                                                                  |
| CIHI—National Ambulatory Care Reporting System (CIHI-NACRS)                      | Patient-level demographic, diagnostic, procedural and treatment information for all hospital-based and community-based ambulatory care, including outpatient and community-based clinics and emergency departments                                                                                                                                                              |
| CIHI-National Rehabilitation Reporting System (NRS)                              | Patient-level demographic, diagnostic, procedural and treatment information from participating adult inpatient rehabilitation facilities and programs                                                                                                                                                                                                                           |
| CIHI-Same Day Surgery (CIHI-SDS)                                                 | Patient-level demographic, diagnostic, procedural and treatment information on all day surgeries                                                                                                                                                                                                                                                                                |
| Citizenship and Immigration Canada (CIC) Database                                | Landing records for permanent legal immigrants to Ontario                                                                                                                                                                                                                                                                                                                       |
| Client Agency Program Enrolment (CAPE)                                           | Information regarding enrollment/rostering of individuals with primary care practitioners, teams and networks                                                                                                                                                                                                                                                                   |
| ICES Physician Database (IPDB)                                                   | Characteristics of physicians and surgeons licenced to practice in Ontario                                                                                                                                                                                                                                                                                                      |
| ICES-derived cohorts                                                             | Validated cohorts of individuals with specific diseases and conditions. These include: Congestive Heart Failure (CHF) database; Chronic Obstructive Pulmonary Disease (COPD) database; Ontario Crohn’s and Colitis Cohort Database (OCCD); Ontario Diabetes Database (ODD); Ontario Myocardial Infarction Database (OMID); and the Ontario Rheumatoid Arthritis Database (ORAD) |
| Ontario Continuing Care Reporting System (CCRS)                                  | Demographic, clinical, functional and resource utilization information on individuals receiving hospital-based complex continuing care services                                                                                                                                                                                                                                 |
| Ontario Drug Benefit (ODB)                                                       | Records of dispensed outpatient prescriptions paid for by the provincial government                                                                                                                                                                                                                                                                                             |
| Ontario Health Insurance Plan database (OHIP)                                    | Claims for physician services paid for by the provincial government                                                                                                                                                                                                                                                                                                             |
| Ontario Home Care Database (HCD)                                                 | Patient-level demographic, diagnostic, procedural and treatment information on all home care visits                                                                                                                                                                                                                                                                             |
| Ontario Mental Health Reporting System (OMHRS)                                   | Patient-level demographic, diagnostic, procedural and treatment information on all adult inpatient mental health visits                                                                                                                                                                                                                                                         |
| Ontario Registered Persons Database (RPDB)                                       | Demographic, place of residence and vital status information for all persons eligible to receive insured health services in the province                                                                                                                                                                                                                                        |
