# Supplementary material
Source: HighWire-hosted journal article supplement (https://bmjopen.bmj.com/content/7/12/e018488)
Supplement: inline-supplementary-material-2 [file inline-supplementary-material-2.pdf]

## Appendix 2: Key variables and sources of data

| Key variables                           | Description                                                                                                                                                                            | Type        | Time period (PRE=1, POST=2) | Data source                      |
|-----------------------------------------|----------------------------------------------------------------------------------------------------------------------------------------------------------------------------------------|-------------|-----------------------------|----------------------------------|
| <b>Patient and care characteristics</b> |                                                                                                                                                                                        |             |                             |                                  |
| age_                                    | Age in years                                                                                                                                                                           | continuous  | 1                           | RPDB                             |
| sex_                                    | Sex; female or male                                                                                                                                                                    | categorical | 1                           | RPDB                             |
| rio2008_                                | Rurality Index for Ontario; on a scale of 0 to 100 with 100 being most rural                                                                                                           | continuous  | 1                           | RPDB                             |
| lhin_                                   | LHINs: 1 to 14                                                                                                                                                                         | categorical | 1                           | RPDB                             |
| income_                                 | Income quintiles                                                                                                                                                                       | categorical | 1                           | RPDB                             |
| recent_immigration_                     | Whether immigrated in the past 15 years                                                                                                                                                | categorical | 1                           | CIC                              |
| primarycaregrp_                         | Primary care model                                                                                                                                                                     | categorical | 1                           | CAPE                             |
| geriatrician_                           | Whether visited a geriatrician                                                                                                                                                         | categorical | 1                           | OHIP                             |
| <b>Health status/comorbidity</b>        |                                                                                                                                                                                        |             |                             |                                  |
| n_edc                                   | John Hopkins Expanded Diagnosis Clusters (EDCs) are based on 3 years of hospitalization and ambulatory data                                                                            | continuous  | 1                           | DAD, NACRS, OHIP                 |
| ices_cohort_                            | Cohorts of individuals with the following conditions separately: CHF, COPD, Inflammatory Bowel Disease (Crohn's and Colitis), diabetes, myocardial infarction, or rheumatoid arthritis | categorical | 1                           | CHF, COPD, OCCD, ODD, OMID, ORAD |
| dth365d_                                | Mortality at the end of FE2013                                                                                                                                                         | categorical | 2                           | RPDB                             |
| <b>Healthcare utilization</b>           |                                                                                                                                                                                        |             |                             |                                  |
| ndrugnames_                             | Number of prescription drugs the patient is on                                                                                                                                         | continuous  | 1,2                         | ODB                              |
| n_md_visits_                            | Number of physician visits; reported as total and by categories (family practitioner and specialist)                                                                                   | continuous  | 1,2                         |                                  |
| n_hcd_visits_                           | Number of home care visits; reported as total and by categories (nursing, personal support, allied health)                                                                             | continuous  | 1,2                         |                                  |
| nhosp_                                  | Number of hospitalizations; reported as total and by categories (urgent and elective)                                                                                                  | continuous  | 1,2                         | DAD                              |

|                         |                                                                                             |             |     |       |
|-------------------------|---------------------------------------------------------------------------------------------|-------------|-----|-------|
| admcat_                 | Admission categories: urgent and elective                                                   | categorical | 1,2 | DAD   |
| los                     | Length of stay, days                                                                        | continuous  | 1,2 | DAD   |
| instftyp_               | Institution from where admitted                                                             | categorical | 1,2 | DAD   |
| instthin_               | LHIN where admitted                                                                         | categorical | 1,2 | DAD   |
| dx10code1-25            | Diagnosis ICD10 codes for each admission                                                    | categorical | 1,2 | DAD   |
| ds10type1-25            | Type of diagnosis code: "M"-MRDX; "1" - preadmission; "2" - post-admission                  | categorical | 1,2 | DAD   |
| dischdisp               | Institution where discharged to                                                             | categorical | 1,2 | DAD   |
| <b>Healthcare costs</b> |                                                                                             |             |     |       |
| inpat_cost_             | Inpatient hospitalization Costs                                                             | continuous  | 1,2 | DAD   |
| sds_cost_               | Same Day Surgery Costs                                                                      | continuous  | 1,2 | SDS   |
| er_cost_                | Emergency Department Costs                                                                  | continuous  | 1,2 | NACRS |
| odb_cost_               | Costs for Ontario Drug Benefits                                                             | continuous  | 1,2 | ODB   |
| hc_cost_                | Costs for Home Care Services                                                                | continuous  | 1,2 | HCD   |
| md_cost_                | Physician expenditures are a combination of the costs for capitation and fees-for -services | continuous  | 1,2 | OHIP  |
| mh_cost_                | Costs for Admissions to Mental Health Care Beds (using OMHRS)                               | continuous  | 1,2 | OMHRS |
| onc_cost_               | Oncology Clinic Costs                                                                       | continuous  | 1,2 | NACRS |
| dial_cost_              | Dialysis Clinic Costs                                                                       | continuous  | 1,2 | NACRS |
| rehab_cost_             | Costs for Rehabilitation                                                                    | continuous  | 1,2 | NRS   |
| ccc_cost_               | Costs for Complex Continuing Care                                                           | continuous  | 1,2 | CCRS  |
| lab_cost_               | Costs for Laboratory investigations                                                         | continuous  | 1,2 | OHIP  |
| ltc_cost_               | Costs for Long-Term Care                                                                    | continuous  | 1,2 | CCRS  |
| total_cost_             | Total healthcare expenditures                                                               | continuous  | 1,2 |       |
