# Supplementary material
Source: HighWire-hosted journal article supplement (https://bmjopen.bmj.com/content/7/12/e018488)
Supplement: inline-supplementary-material-3 [file inline-supplementary-material-3.pdf]

**Appendix 3: Approach to data analyses**

| Outcome                                                                                                                       | Type of response variable | Method of analysis                                                                                                                                              | List of potential covariates, (forward selection)                                                                                                                                                                                                                                                                                                                                                                                                                                                                                                                                                                           |
|-------------------------------------------------------------------------------------------------------------------------------|---------------------------|-----------------------------------------------------------------------------------------------------------------------------------------------------------------|-----------------------------------------------------------------------------------------------------------------------------------------------------------------------------------------------------------------------------------------------------------------------------------------------------------------------------------------------------------------------------------------------------------------------------------------------------------------------------------------------------------------------------------------------------------------------------------------------------------------------------|
| Incremental costs (total and by care category, province wide)                                                                 | <b>Continuous</b>         | Method of recycled predictions using generalized linear regression models with gamma distribution and the log link (incl. two-part models if needed)            | <p><b>Socio -demographic factors:</b><br/>           Age (to be used for per LHIN analysis)<br/>           Sex (to be used for per LHIN analysis)<br/>           Income<br/>           Urban/Rural residence<br/>           Immigration status</p> <p><b>Clinical status and care characteristics:</b><br/>           Number of EDCs and specific clinical clusters of interest such mental disease or dementia<br/>           Access to a geriatrician<br/>           Primary care group affiliation<br/>           Number of physician visits (primary care and specialist)<br/>           Number of home care visits</p> |
| Costs per LHIN (total and by care category)                                                                                   |                           | Multi-level generalized linear models with gamma distribution                                                                                                   |                                                                                                                                                                                                                                                                                                                                                                                                                                                                                                                                                                                                                             |
| HCU rate per LHIN                                                                                                             |                           | Ordinary Least Squares regression model with aggregated values of covariates                                                                                    |                                                                                                                                                                                                                                                                                                                                                                                                                                                                                                                                                                                                                             |
| Incremental rates of healthcare use (e.g. all cause hospital admission, physician visits and home care visits, province wide) | <b>Count</b>              | Method of recycled predictions using generalized linear regression model with negative binomial distribution and the log link (incl. two-part models if needed) |                                                                                                                                                                                                                                                                                                                                                                                                                                                                                                                                                                                                                             |
| Rates of healthcare use by LHIN level                                                                                         |                           | Multi-level generalized linear models with negative binomial distribution                                                                                       |                                                                                                                                                                                                                                                                                                                                                                                                                                                                                                                                                                                                                             |
| All-cause mortality                                                                                                           | <b>Categorical</b>        | Logistic regression                                                                                                                                             |                                                                                                                                                                                                                                                                                                                                                                                                                                                                                                                                                                                                                             |
