# Supplementary material
Source: HighWire-hosted journal article supplement (https://bmjopen.bmj.com/content/7/12/e018488)
Supplement: inline-supplementary-material-4 [file inline-supplementary-material-4.pdf]

**Appendix 4: ACSC conditions and codes**

|    | Condition                                        | ICD-10-CA Codes                                                                                                                                                                                                       | Exclusions                                                                               | Source                        |
|----|--------------------------------------------------|-----------------------------------------------------------------------------------------------------------------------------------------------------------------------------------------------------------------------|------------------------------------------------------------------------------------------|-------------------------------|
| 1  | Angina                                           | I20, I23.82, I24.0, I24.8, I24.9                                                                                                                                                                                      | Cardiac procedure admissions                                                             | <b>CIHI[26]<br/>AHQR*[28]</b> |
| 2  | Asthma                                           | J45                                                                                                                                                                                                                   |                                                                                          |                               |
| 3  | Chronic Obstructive Pulmonary Disease            | J41, J42, J43, J44, J47; J10.0, J11.0, J12–J16, J18, J20, J21, J22 if J44 as a secondary dx                                                                                                                           |                                                                                          |                               |
| 4  | Diabetes                                         | E10.0^^, E10.1^^, E10.63, E10.64, E10.9^^, E11.0^^, E11.1^^, E11.63, E11.64, E11.9^^, E13.0^^, E13.1^^, E13.63, E13.64, E13.9^^, E14.0^^, E14.1^^, E14.63, E14.64, E14.9^^                                            |                                                                                          |                               |
| 5  | Grand mal status and other epileptic convulsions | G40, G41                                                                                                                                                                                                              |                                                                                          |                               |
| 6  | Heart failure and pulmonary edema                | I50, J81                                                                                                                                                                                                              | Cardiac procedure admissions                                                             |                               |
| 7  | Hypertension                                     | I10.0, I10.1, I11                                                                                                                                                                                                     | Cardiac procedure admissions                                                             |                               |
| 8  | Bacterial pneumonia                              | J13, J14, J15211, J15212, J153, J154, J157, J159, J160, J168, J180, J181, J188, J189                                                                                                                                  | Immunocompromised states and procedures#                                                 |                               |
| 9  | Dehydration                                      | E860; E861, E869; (Hyperosmolality and/or hypernatremia) E870; (Gastroenteritis) A080, A0811, A0819, A082, A0831, A0832, A0839, A084, A088, A09, K5289, K529; (Acute kidney failure) N170-N172, N178, N179, N19, N990 | I120, I1311, I132, N185, N186                                                            |                               |
| 10 | Urinary tract infection                          | N10, N119, N12, N151, N159, N16, N2884, N2885, N2886, N3000, N3001, N3090, N3091, N390                                                                                                                                | Kidney/urinary tract disorder diagnosis codes^; Immunocompromised States and Procedures# |                               |

\*AHRQ- Agency for Healthcare Research and Quality; CIHI - Canadian Institute for Health Information
